# Supplementary material for: Habitat generalists and specialists in microbial communities across a terrestrial-freshwater gradient
Source: PubMed Central journal article supplement (PMC5123577; doi:10.1038/srep37719), 2016-11-25

**Habitat generalists and specialists in microbial communities across a terrestrial-freshwater gradient**

MONARD C.<sup>1a</sup>, GANTNER S.<sup>1,2b</sup>, BERTILSSON S.<sup>2</sup>, HALLIN S.<sup>1</sup>, STENLID J.<sup>1</sup>

Table S1. Details of the amount of reads and OTUs obtained from the 454 barcoded pyrosequencing analysis for the four datasets (A) and for each dataset (B).

**A**

| Dataset  | Total reads | Good reads | Singletons | OTUs   |
|----------|-------------|------------|------------|--------|
| ITS1     | 719 587     | 101 115    | 4 734      | 2 295  |
| ITS2     | 719 587     | 81 250     | 4 064      | 2 062  |
| Bacteria | 743 441     | 641 230    | 16 180     | 41 418 |
| Archaea  | 856 453     | 624 321    | 1 457      | 3 497  |

**B**

|      |        | Fungi      |           |       | Bacteria   |           |        | Archaea    |           |       |
|------|--------|------------|-----------|-------|------------|-----------|--------|------------|-----------|-------|
|      |        | Good reads | Singleton | OTUs  | Good reads | Singleton | OTUs   | Good reads | Singleton | OTUs  |
| ITS1 | AS-Top | 1 296      | 162       | 369   | 39 708     | 900       | 10 494 | 40 889     | 68        | 1 936 |
|      | AS-Low | 3 465      | 265       | 434   | 33 464     | 1 065     | 10 098 | 42 002     | 60        | 1 782 |
|      | DH-Top | 11 696     | 522       | 790   | 66 075     | 1 243     | 14 086 | 36 726     | 16        | 506   |
|      | DH-Med | 5 830      | 239       | 487   | 41 586     | 1 354     | 10 622 | 36 461     | 18        | 602   |
|      | DH-Low | 1 860      | 68        | 246   | 38 472     | 563       | 8 122  | 36 685     | 24        | 425   |
|      | CF-Top | 14 323     | 606       | 978   | 42 485     | 640       | 9 392  | 31 071     | 44        | 916   |
|      | CF-Med | 14 325     | 360       | 756   | 39 312     | 720       | 7 524  | 31 090     | 24        | 386   |
|      | CF-Low | 7 322      | 180       | 475   | 29 449     | 922       | 6 515  | 36 714     | 52        | 713   |
|      | FL-Top | 13 662     | 742       | 1 055 | 54 113     | 1 045     | 13 014 | 52 546     | 82        | 1 997 |
|      | FL-Med | 4 694      | 210       | 441   | 30 415     | 1 654     | 8 790  | 26 011     | 28        | 1 611 |
|      | FL-Low | 3 618      | 101       | 186   | 12 960     | 220       | 3 214  | 16 589     | 32        | 898   |
|      | SH-1   | 4 239      | 288       | 350   | 47 156     | 1 304     | 12 022 | 37 583     | 60        | 1 145 |
|      | SH-2   | 242        | 14        | 33    | 492        | 7         | 356    | 31 461     | 31        | 616   |
|      | SH-3   | 1 740      | 75        | 116   | 31 621     | 910       | 8 405  | 39 813     | 63        | 920   |
|      | SH-4   | 4 114      | 45        | 65    | 23         | 0         | 17     | 9 068      | 5         | 97    |
|      | SH-5   | 3 828      | 325       | 474   | 52 167     | 1 159     | 12 233 | 28 707     | 121       | 1 538 |
|      | SE-Top | 1 077      | 166       | 239   | 27 579     | 965       | 5 872  | 36 071     | 153       | 1 303 |
|      | SE-Low | 775        | 164       | 189   | 38 798     | 1 214     | 7 989  | 32 958     | 548       | 1 785 |
|      | LA-1   | 757        | 40        | 55    | 1 651      | 27        | 203    | 7 864      | 15        | 118   |
| LA-2 | 314    | 26         | 50        | 6 608 | 48         | 434       | 12 685 | 10         | 79        |       |
| LA-3 | 1 938  | 136        | 206       | 7 096 | 220        | 2 005     | 1 327  | 3          | 51        |       |
| ITS2 | AS-Top | 840        | 115       | 259   |            |           |        |            |           |       |
|      | AS-Low | 2 276      | 213       | 353   |            |           |        |            |           |       |
|      | DH-Top | 12 265     | 552       | 858   |            |           |        |            |           |       |
|      | DH-Med | 3 549      | 150       | 419   |            |           |        |            |           |       |
|      | DH-Low | 1 563      | 48        | 214   |            |           |        |            |           |       |
|      | CF-Top | 12 324     | 545       | 815   |            |           |        |            |           |       |
|      | CF-Med | 9 447      | 219       | 590   |            |           |        |            |           |       |
|      | CF-Low | 4 013      | 119       | 355   |            |           |        |            |           |       |
|      | FL-Top | 10 355     | 658       | 975   |            |           |        |            |           |       |
|      | FL-Med | 3 618      | 183       | 395   |            |           |        |            |           |       |
|      | FL-Low | 4 120      | 114       | 168   |            |           |        |            |           |       |
|      | SH-1   | 4 114      | 295       | 341   |            |           |        |            |           |       |
|      | SH-2   | 187        | 12        | 34    |            |           |        |            |           |       |
|      | SH-3   | 2 586      | 86        | 149   |            |           |        |            |           |       |
|      | SH-4   | 3 476      | 30        | 52    |            |           |        |            |           |       |
|      | SH-5   | 1 895      | 195       | 261   |            |           |        |            |           |       |
|      | SE-Top | 301        | 91        | 123   |            |           |        |            |           |       |
|      | SE-Low | 995        | 232       | 263   |            |           |        |            |           |       |
|      | LA-1   | 1 230      | 39        | 70    |            |           |        |            |           |       |
| LA-2 | 201    | 19         | 36        |       |            |           |        |            |           |       |
| LA-3 | 1 895  | 149        | 207       |       |            |           |        |            |           |       |

Fig S1. Fungal (ITS gene copy number; A), bacterial (16S gene copy number; B) and archaeal (16S gene copy number; C) abundances in the soil (per gram of dry soil), sediments (per gram of dry sediment) and water (per liter) samples determined by qPCR.

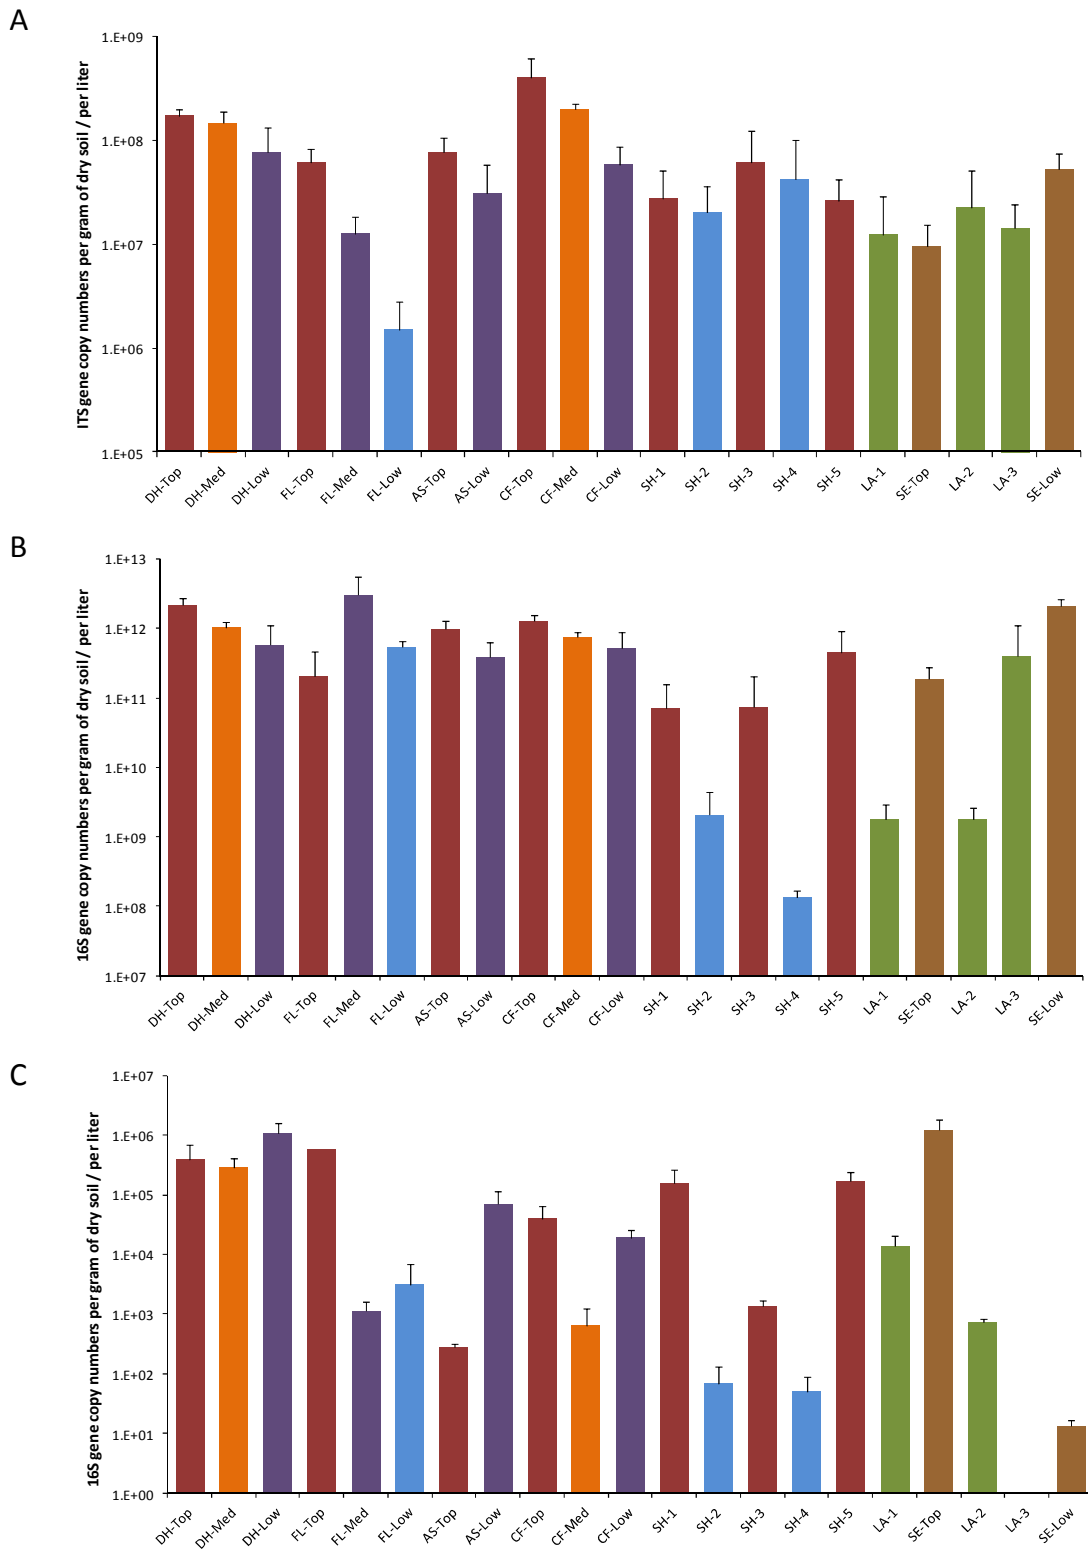

Fig. S2. Dendrogram presenting the Bray-Curtis dissimilarity of the microbial composition (main OTUs) in the three replicated samples across environmental samples.

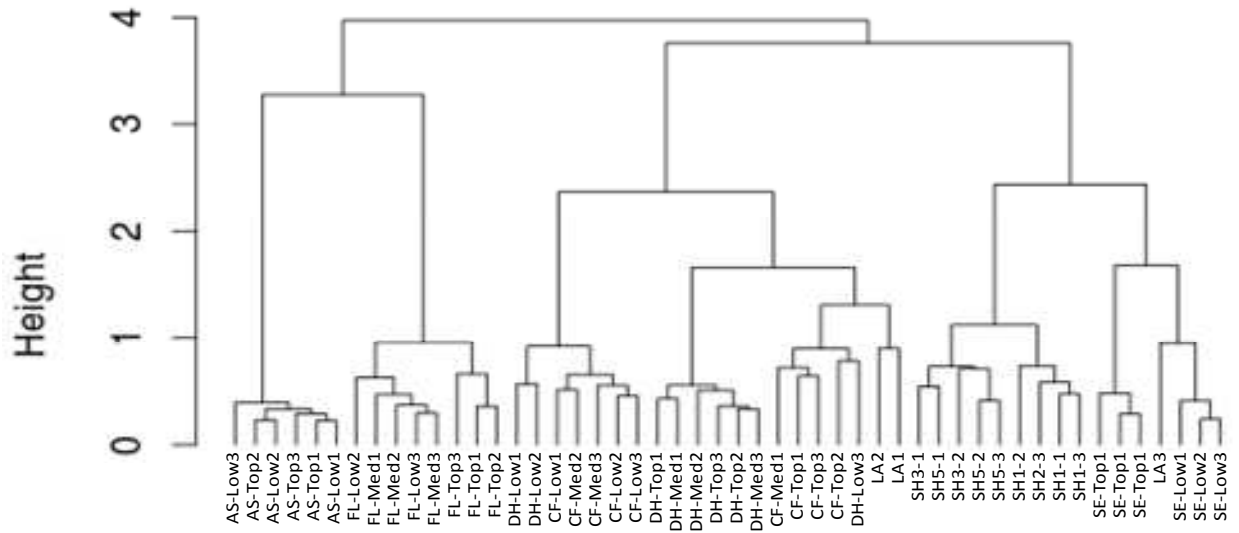

Supplement: srep37719-s1.pdf [file srep37719-s1.pdf]
